# Supplementary material for: A systematic review and meta-analysis of studies comparing muscle-in-vein conduits with autologous nerve grafts for nerve reconstruction
Source: PubMed Central journal article supplement (PMC8175734; doi:10.1038/s41598-021-90956-3), 2021-06-03
Supplement: 41598_2021_90956_MOESM1_ESM.pdf [file 41598_2021_90956_MOESM1_ESM.pdf]

# A systematic review and meta-analysis of studies comparing muscle-in-vein conduits with autologous nerve grafts for nerve reconstruction

Johannes C. Heinzel<sup>1,2,3\*</sup>, Mai Quyen-Nguyen<sup>2,3</sup>, Laura Kefalianakis<sup>1</sup>, Cosima Prahm<sup>1</sup>, Adrien Daigeler<sup>1</sup>, David Hercher<sup>2,3</sup>, Jonas Kolbensschlag<sup>1</sup>

<sup>1</sup> Department of Hand-, Plastic, Reconstructive and Burn Surgery, BG Klinik Tuebingen, Eberhard Karls University, Schnarrenbergstraße 95, Tuebingen, Germany

<sup>2</sup> Ludwig Boltzmann Institute for Experimental and Clinical Traumatology, Donaueschingenstraße 13, Vienna, Austria

<sup>3</sup> Austrian Cluster for Tissue Regeneration

\* Correspondence:

Johannes C. Heinzel

[hannes.heinzel@gmx.de](mailto:hannes.heinzel@gmx.de)

## Supplementary Material

Supplementary Table 1 – Search terms and results of the literature research according to the PRISMA guidelines.

| Search term(s)              | Results from PubMed | Results from Web of Science |
|-----------------------------|---------------------|-----------------------------|
| muscle-in-vein AND conduit  | 6                   | 10                          |
| muscle-in-vein AND graft    | 8                   | 13                          |
| muscle-vein AND conduit     | 13                  | 15                          |
| muscle-vein AND graft       | 22                  | 26                          |
| muscle-vein AND nerve       | 26                  | 48                          |
| muscle-in-vein AND nerve    | 10                  | 14                          |
| “muscle and vein conduit”   | 4                   | 1                           |
| “muscle and vein conduits”  | 5                   | 1                           |
| “muscle and vein graft”     | 1                   | 0                           |
| “muscle and vein grafts”    | 3                   | 0                           |
| “muscle-stuffed vein”       | 3                   | 6                           |
| “vein filled with muscle”   | 5                   | 6                           |
| “vein” AND “muscle graft*”  | 22                  | 48                          |
| “vein conduit*” AND “nerve” | 55                  | 80                          |
| <b>Total</b>                | <b>183</b>          | <b>268</b>                  |

Supplementary Table 2 – Excluded preclinical studies.

| Study                     | Reason for exclusion                                 |
|---------------------------|------------------------------------------------------|
| Battiston <sup>1</sup>    | No control group (ANG) featured                      |
| Couturier <sup>2</sup>    | No control group (ANG) featured                      |
| Di Benedetto <sup>3</sup> | No control group (ANG) featured                      |
| Fernandes <sup>4</sup>    | Full-text not available in English                   |
| Fornaro <sup>5</sup>      | Reported outcome measures not relevant for synthesis |
| Geuna <sup>6</sup>        | Reported outcome measures not relevant for synthesis |
| Geuna <sup>7</sup>        | Full-text not available                              |
| Geuna <sup>8</sup>        | Reported outcome measures not relevant for synthesis |

|                                     |                                                      |
|-------------------------------------|------------------------------------------------------|
| Geuna <sup>9</sup>                  | Reported outcome measures not relevant for synthesis |
| Li <sup>10</sup>                    | No control group (ANG) featured                      |
| Mohammadi <sup>11</sup>             | No control group (ANG) featured                      |
| Nicolino <sup>12</sup>              | No control group (ANG) featured                      |
| Nijhuis <sup>13</sup>               | Non-standardized way to prepare the MVCs             |
| Pagnotta <sup>14</sup>              | Reported outcome measures not relevant for synthesis |
| Raimondo <sup>15</sup>              | Reported outcome measures not relevant for synthesis |
| Tos <sup>16</sup>                   | Reported outcome measures not relevant for synthesis |
| Tos <sup>17</sup>                   | Reported outcome measures not relevant for synthesis |
| Tos <sup>18</sup>                   | Reported outcome measures not relevant for synthesis |
| Tuncel <sup>19</sup>                | Non-standardized way to prepare the MVCs             |
| Manthou <sup>20</sup>               | No control group (ANG) featured                      |
| Jemnoschi-Hreniuc ( <sup>21</sup> ) | Non-standardized way to prepare the MVCs             |

**Supplementary Table 3** – Excluded clinical studies.

| <b>Study</b>            | <b>Reason for exclusion</b>     |
|-------------------------|---------------------------------|
| Battiston <sup>22</sup> | No control group (ANG) featured |
| Battiston <sup>23</sup> | No control group (ANG) featured |
| Marcoccio <sup>24</sup> | No control group (ANG) featured |
| Schiefer <sup>25</sup>  | No control group (ANG) featured |

1. Battiston, B., Tos, P., Geuna, S., Giacobini-Robecchi, M.G. & Guglielmone, R. Nerve repair by means of vein filled with muscle grafts. II. Morphological analysis of regeneration. *Microsurgery* **20**, 37-41 (2000).
2. Couturier, C.A., Dauge, M.C., Henin, D., Alnot, J.Y. & Masméjean, E.H. Nerve repair using a composite graft of vein and denatured skeletal muscle: morphologic analysis. *J Reconstr Microsurg* **18**, 681-688 (2002).
3. Di Benedetto, G., *et al.* Nerve regeneration through a combined autologous conduit (vein plus acellular muscle grafts). *Biomaterials* **19**, 173-181 (1998).
4. Fernandes, M., *et al.* Comparative study between autogenous graft and muscular graft covered with autogenous vein tube in Wistar rats' tibial nerves using the Fluoro-Gold® as a neuronal marker. *Acta Ortopédica Brasileira* **15**, 97-100 (2006).
5. Fornaro, M., Tos, P., Geuna, S., Giacobini-Robecchi, M.G. & Battiston, B. Confocal imaging of Schwann-cell migration along muscle-vein combined grafts used to bridge nerve defects in the rat. *Microsurgery* **21**, 153-155 (2001).
6. Geuna, S., Tos, P., Battiston, B., Guglielmone, R. & Giacobini-Robecchi, M.G. Morphological analysis of peripheral nerve regenerated by means of vein grafts filled with fresh skeletal muscle. *Anat Embryol (Berl)* **201**, 475-482 (2000).
7. Geuna, S., Tos, P., Battiston, B., Guglielmone, R. & Giacobini-Robecchi, M.G. A stereological study of long-term regeneration of rat severed sciatic nerve repaired by means of muscle-vein-combined grafts. *Ital J Anat Embryol* **105**, 65-73 (2000).
8. Geuna, S., *et al.* Schwann-cell proliferation in muscle-vein combined conduits for bridging rat sciatic nerve defects. *J Reconstr Microsurg* **19**, 119-123; discussion 124 (2003).
9. Geuna, S., *et al.* Nerve regeneration along bioengineered scaffolds. *Microsurgery* **27**, 429-438 (2007).

10. Li, Y.L., Gao, Z.Q., Wang, Z.L., Liu, Y.G. & Zhang, Q.H. Autogenous inside-out versus standard vein and skeletal muscle-combined grafting for facial nerve repair. *Neural Regeneration Research* **5**, 282-286 (2010).
11. Mohammadi, J., Delaviz, H., Mohammadi, B., Delaviz, H. & Rad, P. Comparison of repair of peripheral nerve transection in predegenerated muscle with and without a vein graft. *BMC Neurol* **16**, 237 (2016).
12. Nicolino, S., *et al.* Expression of alpha2a-2b neuregulin-1 is associated with early peripheral nerve repair along muscle-enriched tubes. *Neuroreport* **14**, 1541-1545 (2003).
13. Nijhuis, T.H., *et al.* Natural conduits for bridging a 15-mm nerve defect: comparison of the vein supported by muscle and bone marrow stromal cells with a nerve autograft. *J Plast Reconstr Aesthet Surg* **66**, 251-259 (2013).
14. Pagnotta, A., *et al.* Neurotrophins and their receptors in early axonal regeneration along muscle-vein-combined grafts. *Microsurgery* **22**, 300-303 (2002).
15. Raimondo, S., *et al.* Schwann cell behavior after nerve repair by means of tissue-engineered muscle-vein combined guides. *J Comp Neurol* **489**, 249-259 (2005).
16. Tos, P., *et al.* Tissue specificity in rat peripheral nerve regeneration through combined skeletal muscle and vein conduit grafts. *Microsurgery* **20**, 65-71 (2000).
17. Tos, P., *et al.* Use of muscle-vein-combined Y-chambers for repair of multiple nerve lesions: experimental results. *Microsurgery* **24**, 459-464 (2004).
18. Tos, P., *et al.* Comparison of fresh and predegenerated muscle-vein-combined guides for the repair of rat median nerve. *Microsurgery* **27**, 48-55 (2007).
19. Tuncel, U., *et al.* The Effect of Autologous Fat Graft with Different Surgical Repair Methods on Nerve Regeneration in a Rat Sciatic Nerve Defect Model. *Plast Reconstr Surg* **136**, 1181-1191 (2015).
20. Manthou, M.E., *et al.* Facial nerve repair by muscle-vein conduit in rats: functional recovery and muscle reinnervation. *Tissue Eng Part A* (2020).
21. Jemnoschi-Hreniuc, I., *et al.* Prolonging Nerve Grafts Using Chemical Extracted Muscle-in-vein with Vein Window Method Chemical acellular nerve grafts. *Revista de Chimie -Bucharest- Original Edition- December*(2017).
22. Battiston, B., Tos, P., Cushway, T.R. & Geuna, S. Nerve repair by means of vein filled with muscle grafts I. Clinical results. *Microsurgery* **20**, 32-36 (2000).
23. Battiston, B., Tos, P., Conforti, L.G. & Geuna, S. Alternative techniques for peripheral nerve repair: conduits and end-to-side neurorrhaphy. *Acta Neurochir Suppl* **100**, 43-50 (2007).
24. Marcoccio, I. & Vigasio, A. Muscle-in-vein nerve guide for secondary reconstruction in digital nerve lesions. *J Hand Surg Am* **35**, 1418-1426 (2010).
25. Schiefer, J.L., *et al.* Comparison of short- with long-term regeneration results after digital nerve reconstruction with muscle-in-vein conduits. *Neural Regen Res* **10**, 1674-1677 (2015).
